# Supplementary material
Source: publisher site journal article supplement (http://kjim.org/upload/media/kjim-2021-410-suppl6.pdf)
Supplement: Supplementary file 1 [file kjim-2021-410-suppl6.pdf]

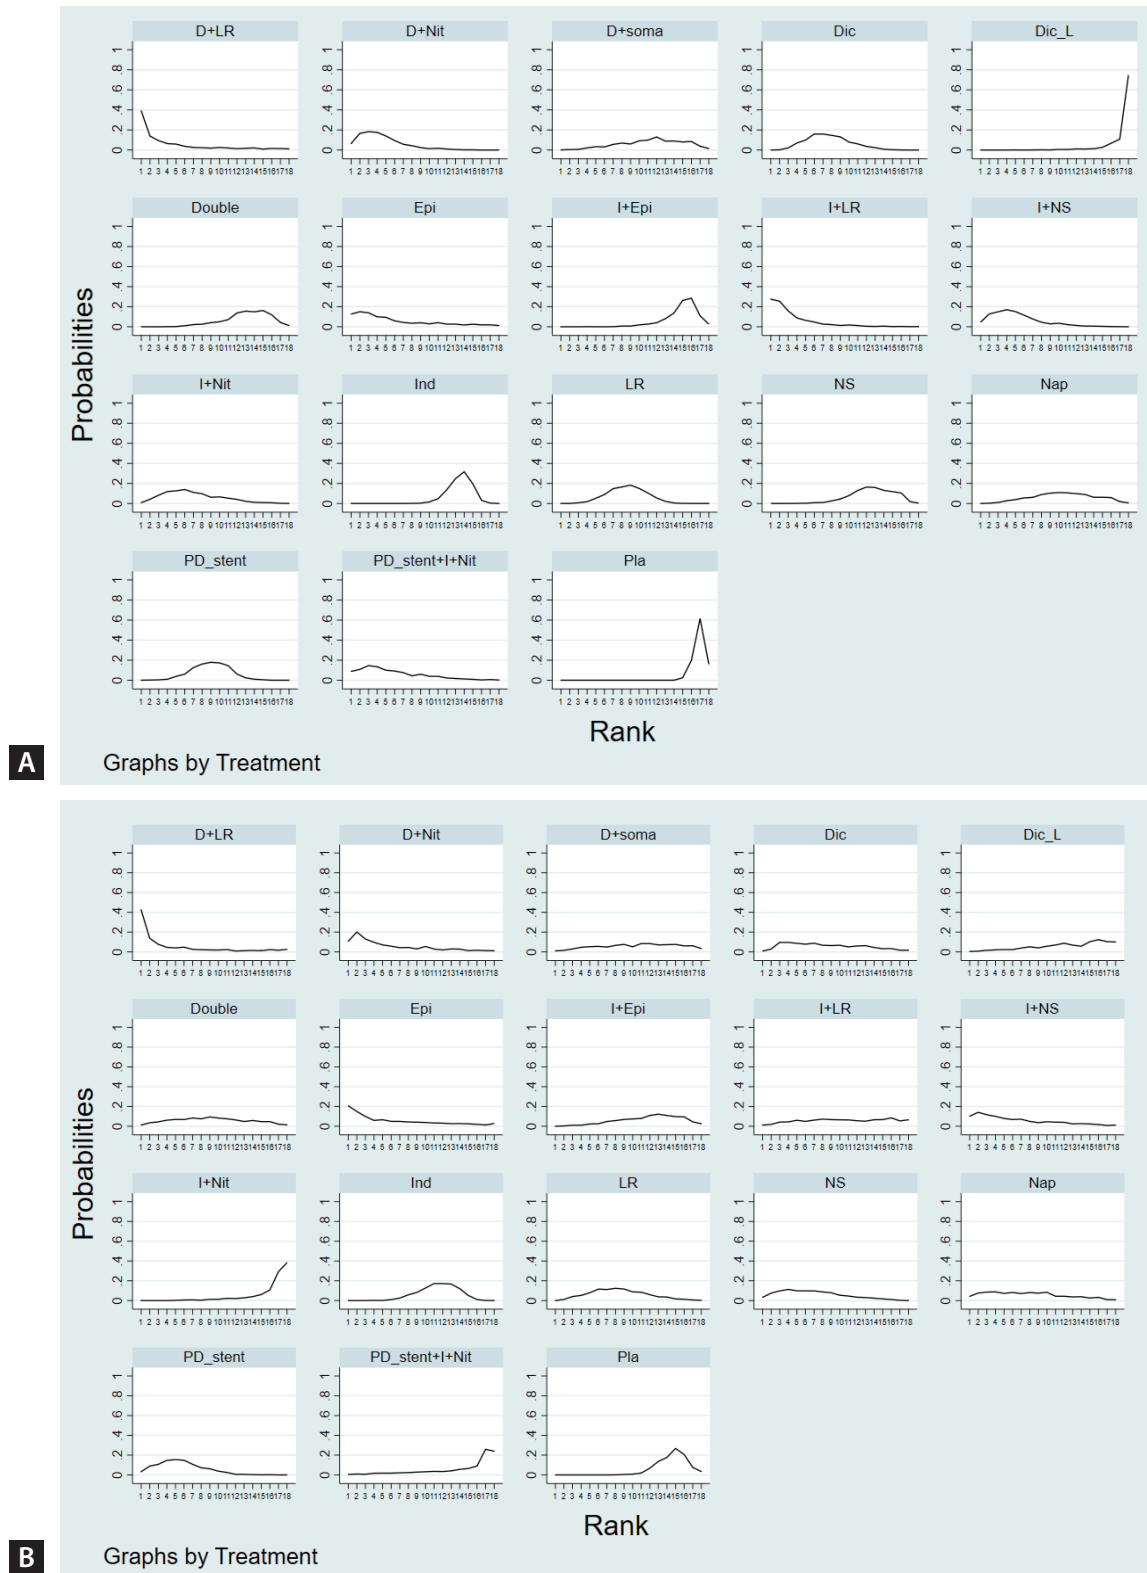

**Supplementary Figure 4.** Rankogram. Profiles indicate the probabilities for treatments to assume any of the possible ranks. It is the probability that a given treatment ranks first, second, third, and so on, among all of the treatments evaluated in the network meta-analysis. (A) Overall post-endoscopic retrograde cholangiopancreatography (ERCP) pancreatitis (PEP), (B) mild PEP, (C) moderate-to-severe PEP, (D) average-risk group, (E) high-risk group. D or Dic, diclofenac; Dic\_L, diclofenac low dose; Double, double dose of indomethacin; Epi, epinephrine; I or Ind, indomethacin; LR, lactated Ringer’s solution; Nap, naproxen; Nit, nitrate; NS, normal saline; PD, pancreatic duct; Pla, placebo; soma, somatostatin.

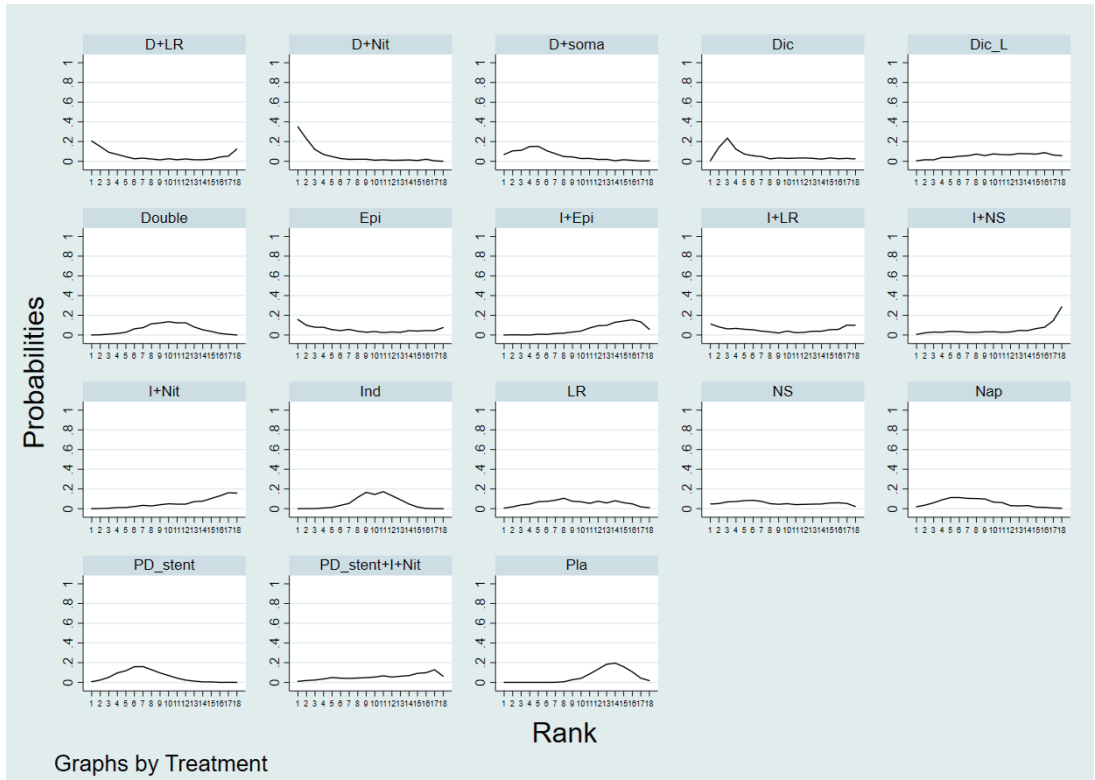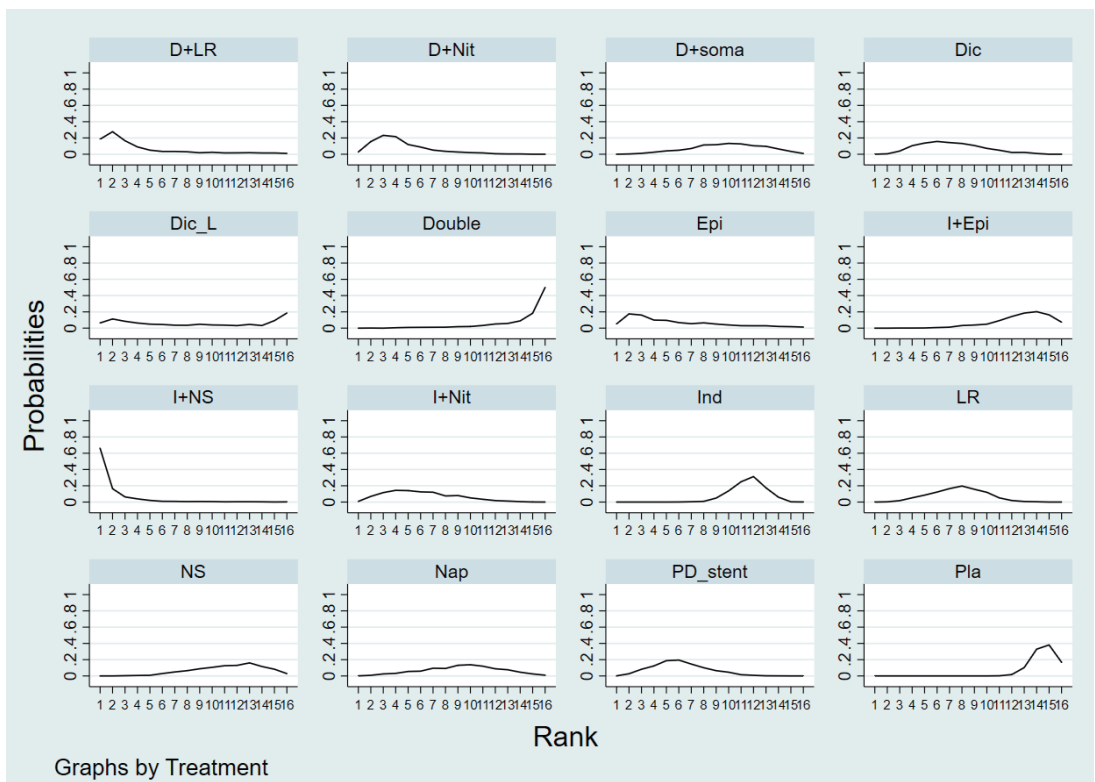

Supplementary Figure 4. Continued.

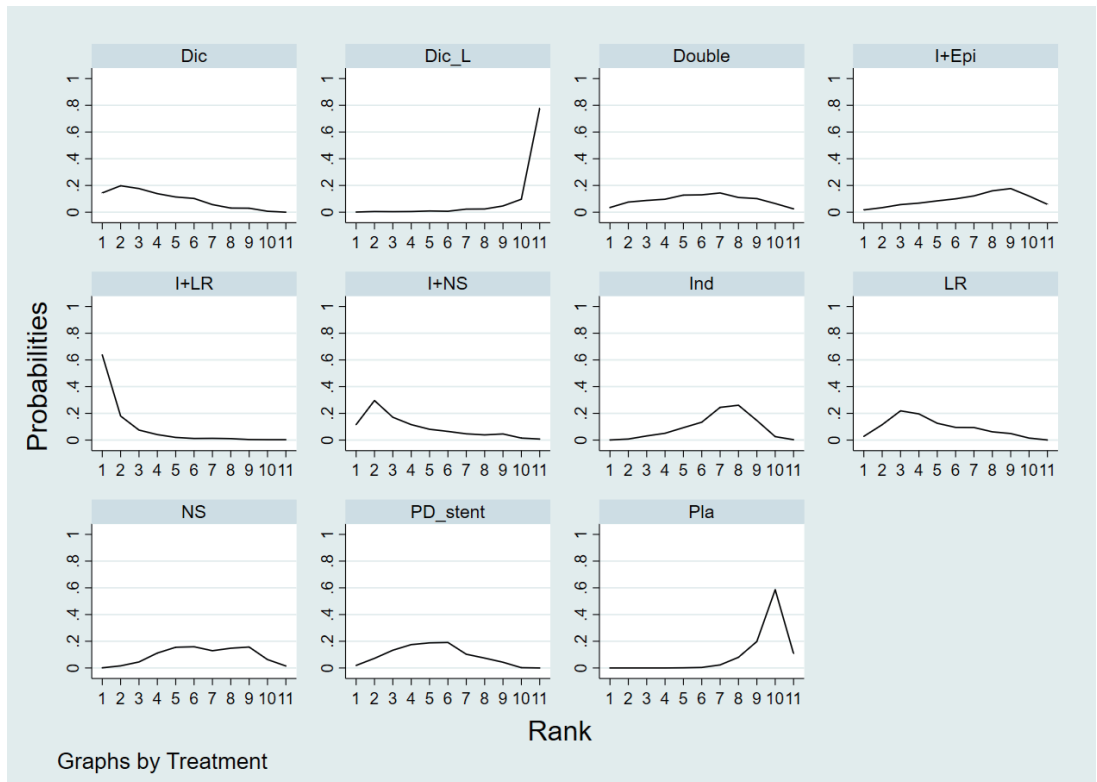

Supplementary Figure 4. Continued.
